1 **Classification of hospital and urban wastewater resistome and microbiota over time and their**  
2 **relationship to the eco-exposome.**

3 Elena Buelow<sup>1\*</sup>, Andreu Rico<sup>2</sup>, Margaux Gaschet<sup>1</sup>, José Lourenço<sup>3</sup>, Sean P. Kennedy<sup>4</sup>, Laure Wiest<sup>5</sup>,  
4 Marie-Cecile Ploy<sup>1#</sup>, Christophe Dagot<sup>1#</sup>

5

6 <sup>1</sup>Université Limoges, INSERM, CHU Limoges, UMR 1092, Limoges, France;

7 <sup>2</sup>IMDEA Water Institute, Science and Technology Campus of the University of Alcalá, Avenida Punto Com 2, 28805,  
8 Alcalá de Henares, Madrid, Spain;

9 <sup>3</sup>Department of Zoology, University of Oxford, Oxford, UK;

10 <sup>4</sup>Biomics Pole, CITECH, Institut Pasteur, Paris 75015, France;

11 <sup>5</sup>Univ Lyon, CNRS, Université Claude Bernard Lyon, Institut des Sciences Analytiques, UMR 5280, 5 Rue de la Doua,  
12 F-69100, Villeurbanne, France;

13 #These authors participated equally to the work.

14 \*Corresponding author: [elena.buelow@gmail.com](mailto:elena.buelow@gmail.com)

15 UMR Inserm 1092, Agents Anti-Microbiens, CBRS, Faculté de médecine, 1 rue du Pr Bernard Descottes, 87000  
16 Limoges

17 Phone number: +33 55 5 19 56 42 62

18

19

20

21

22

23

24

25

26

27 **Abstract**

28 Wastewaters (WW) are important sources for the dissemination of antimicrobial resistance (AMR) into  
29 the environment. Hospital WW (HWW) contain higher loads of micro-pollutants and AMR markers than  
30 urban WW (UWW). Little is known about the long-term dynamics of H and U WW and the impact of their  
31 joined treatment on the general burden of AMR. Here, we characterized the resistome, microbiota and  
32 eco-exposome signature of 126 H and U WW samples treated separately for three years, and then mixed,  
33 over one year. Multi-variate analysis and machine learning, revealed a robust signature for each WW with  
34 no significant variation over time before mixing, and once mixed, both WW closely resembled U  
35 signatures. We demonstrated a significant impact of pharmaceuticals and surfactants on the resistome  
36 and microbiota of H and U WW. Our results present considerable targets for AMR related risk assessment  
37 of WW.

38

39

40

41 The worldwide spread of multidrug-resistant bacteria is an important public health issue with a high  
42 health and economic burden<sup>1-3</sup>. A global “One Health” approach is urgently needed to combat the  
43 dissemination of antibiotic resistant bacteria (ARB) and antimicrobial resistance genes (ARGs) from  
44 humans and livestock to the environment and vice versa, as well as to identify key drivers contributing to  
45 the selection, dissemination and persistence of ARB and/or ARGs<sup>4,5</sup>. The natural environment and its  
46 biodiversity serve as a wide reservoir of genetic determinants implicated in resistance to antimicrobial  
47 compounds<sup>6,7</sup>. Human activity has a significant impact on the terrestrial and aquatic microbial ecosystems  
48 through chemical pollutants that are spread via urban, agricultural and industrial waste and which pose  
49 an important selective pressure for AMR<sup>8</sup>. For instance, urban and hospital wastewaters (UWW and  
50 HWW) contain a high diversity of ARGs and chemicals<sup>9-12</sup>. It is therefore generally accepted that the  
51 implementation of efficient wastewater treatment plants (WWTP) is essential in order to reduce the  
52 amounts of chemicals, ARGs and ARB that reach the environment<sup>4,9,13</sup>. The treated WW are re-introduced  
53 into the aquatic environment and the produced sludge often re-used in agricultural lands<sup>11,14</sup>. However,  
54 despite a global reduction of ARGs through treatment, effluents from urban, hospital and industrial  
55 wastewater still contain ARGs, antibiotics (ABs) and moderate levels of other pollutants affecting  
56 microorganisms (e.g. biocides, heavy metals)<sup>11,15,16</sup>. HWWs have been reported to contain particularly high  
57 amounts of ARGs, ABs and metabolites<sup>9,12,17</sup>, due to the high usage of ABs and biocides<sup>18,19</sup> in these  
58 settings. It has been debated whether HWW contributes significantly to the load of ARGs in the UWW  
59 systems, and whether separate treatment for HWWs should be applied<sup>9,13,20</sup>. Recent work has shown that  
60 HWW has limited impact on the relative levels of ARGs and integrons in hospital receiving urban  
61 wastewater (WW)<sup>9,21</sup>. However, most studies usually analyzed a limited number of samples and yet,  
62 longitudinal studies that monitor WW dynamics are so far lacking, which limits the possibility of assessing  
63 the risk for AMR mediated through WW.

64 We thus studied the dynamics of the resistome, microbiota and the environmental exposome (“eco-  
65 exposome”) of 126 WW samples (UWW, HWW and mixed WW) in a French city during a period of  
66 approximately four years: 34 months with separate treatments for H and U WW and 11 months with H  
67 and U WW mixed. We studied H and U WW in the course of their passage through i) two independent  
68 wastewater treatment systems applying the conventional (activated sludge) treatment process and ii)  
69 then mixed 1:2 (HWW:UWW) into one system. We investigated the relationship of the respective  
70 resistome and microbiota with the measured eco-exposome (pharmaceuticals, mainly antibiotics;  
71 surfactants and heavy metals), and their discharge in the effluent receiving river. Multi-variate analysis  
72 and machine learning, reveal a robust signature of the resistome, microbiota and eco-exposome of HWW

73 compared to UWW with no significant variation over time. We also showed that, when mixed, both WW  
74 closely resemble urban signatures. Furthermore, we demonstrated that pharmaceuticals and surfactants  
75 had a large influence on the variability of the monitored resistome and microbiota of H and U WW.

76

77

78

79

80

81

82

83

84

## 85 **Results:**

86 **HWW and UWW have distinct resistome and microbiota signatures.** We evaluated the resistome and  
87 microbiota of monthly WW (N=126) and river (N= 12) samples. For the resistome, we targeted 78 genes  
88 conferring resistance to antibiotics, quaternary ammonium compounds, or heavy metals, grouped into 16  
89 resistance gene classes. The genes targeted include ARGs that are most commonly detected in the gut  
90 microbiota of healthy individuals<sup>22,23</sup>, clinically relevant ARGs (including genes encoding extended  
91 spectrum  $\beta$ -lactamases (ESBLs), carbapenemases, and vancomycin resistance), heavy metal and  
92 quaternary ammonium compound resistance genes suggested to favor cross and co – selection for ARGs  
93 in the environment<sup>24,25</sup>. We also targeted genetic elements as important transposase gene families<sup>26</sup> and  
94 class 1, 2 and 3 integron integrase genes, that are important vectors for ARGs in the clinics and often used  
95 as proxy for anthropogenic pollution<sup>27</sup>.

96 H and U WW samples were treated separately through 2012 and 2014, and were mixed at a ratio  
97 of 1:2 (HWW:UWW) throughout the year 2015 (Figure 1). H and U WW samples had a distinct signature  
98 with respect to the proportional makeup of their resistome (Figure 2a) and microbiota (Figure 2b).  
99 Analyzing the data with a machine learning approach showed that the distinct H and U WW signatures  
100 resulted in a high prediction accuracy (full details in SI). When using the resistome as predictor (on the  
101 level of gene classes), 93.5% and 96.7% of untreated HWW and UWW samples respectively, could be  
102 correctly classified (Supplementary Figure 1a). We further analyzed the data on the individual gene level  
103 (81 different genes) to increase resolution of the machine learning approach. Using individual genes  
104 resulted in similarly high predictions (93.5% prediction for untreated HWW and 100% prediction for  
105 untreated UWW) (Supplementary Figure 1b). Similarly, when using the microbiota, 96.8% of untreated  
106 HWW and 89% of untreated UWW samples were correctly classified (Supplementary Figure 1c).

107 For the treated H and U WW the machine learning prediction accuracy was lower compared to  
108 the untreated WW sources but still considerably high for all predictor levels and in particular for the  
109 microbiota ( $\geq 80\%$ ) (Supplementary Figure 2).

110 For the MWW overall classification success was lower (Supplementary Figure 1 and 2), given a  
111 much lower sample size and likely due to the mixing of the two wastewater sources hampering clear  
112 signatures.

113

114

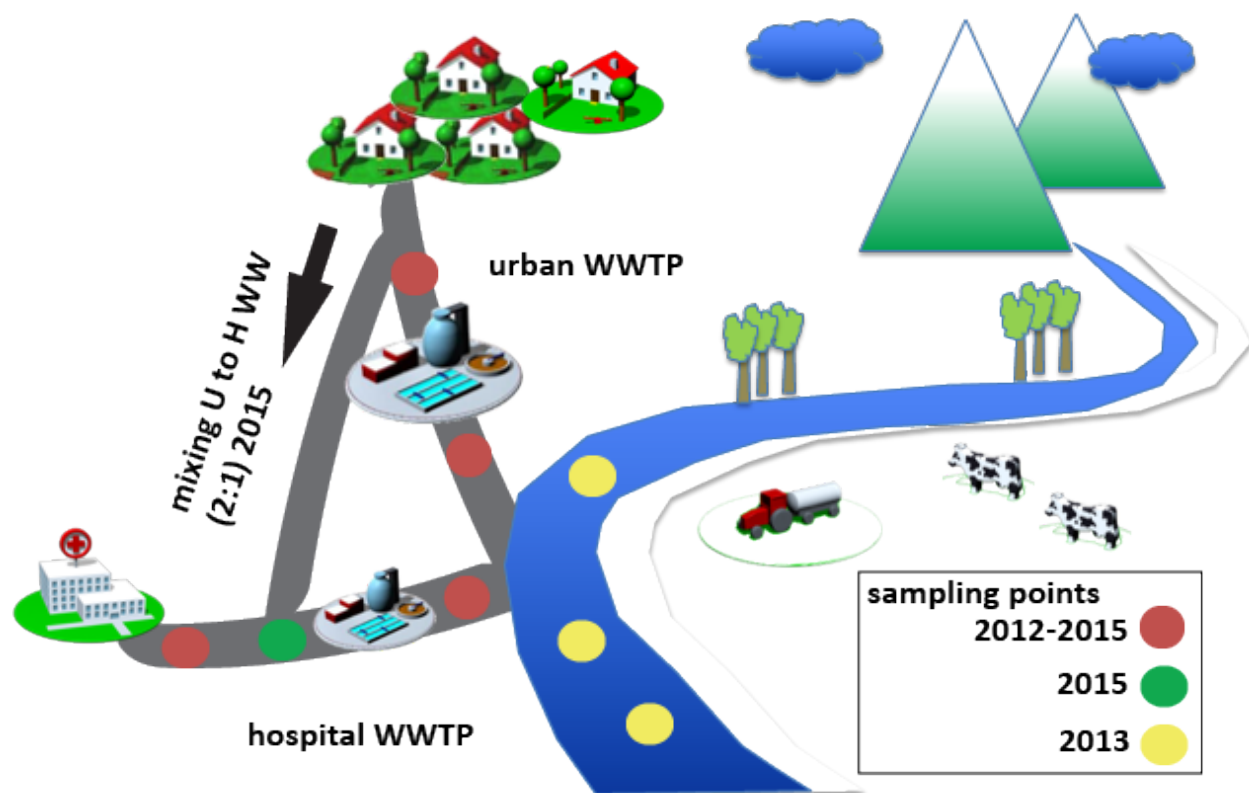

115

116 **Figure 1: Sampling site.** Samples were collected in monthly intervals (untreated and treated samples) by flow  
117 proportional sampling, from March 2012 through November 2015. From March 2012 to December 2014, UWW and  
118 HWW were treated by separate wastewater treatment plants (WWTPs). During the period from January 2015  
119 through November 2015, UWW was mixed into the HWW (1:2 ratio HWW:UWW) and added to the separate HWW  
120 treatment line resulting in mixed WW (MWW). In addition, 12 water samples of the effluent receiving river up (river  
121 upstream) and downstream (river downstream sampling point 1 and 2) of the effluent release pipes were collected  
122 during the winter months of 2013 (January, February, November, and December).

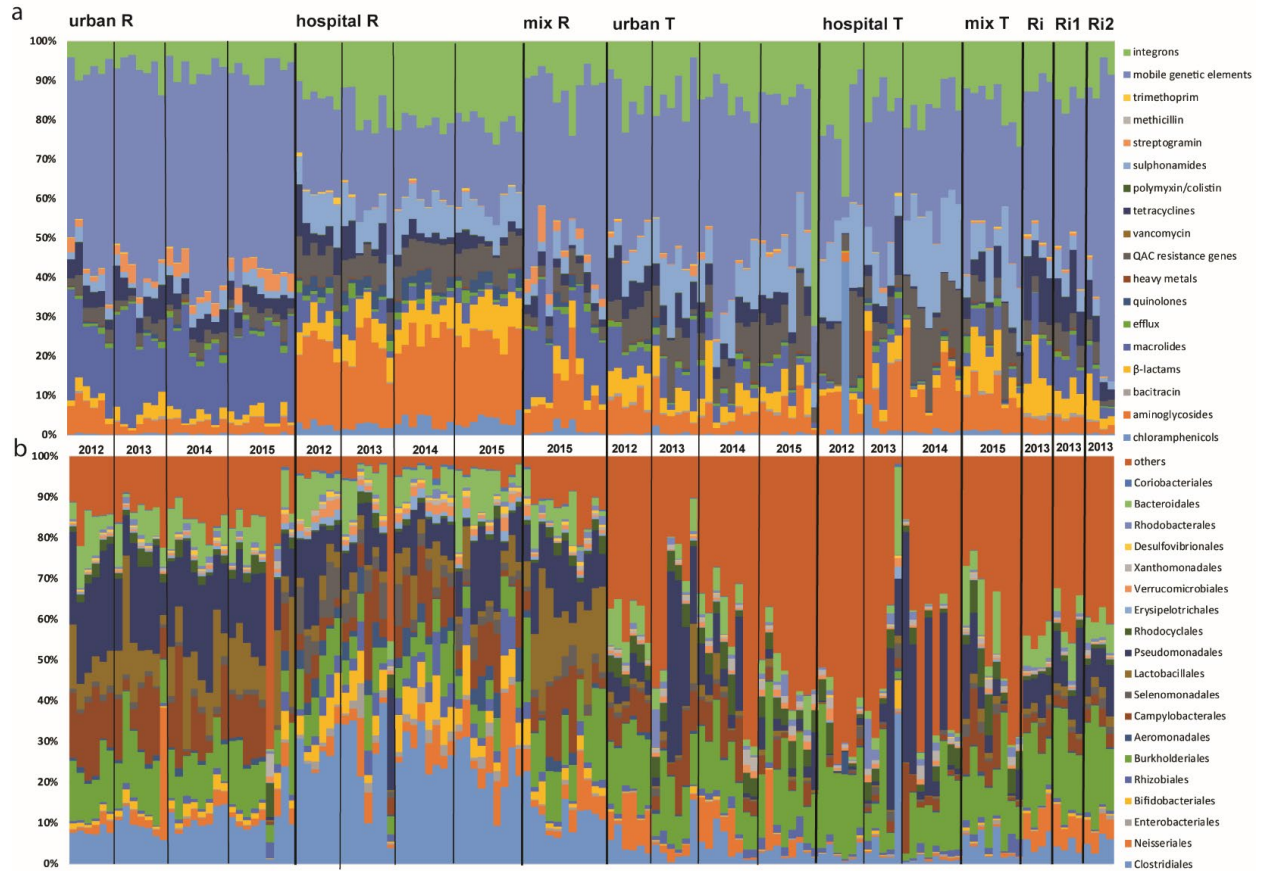

123

124 **Figure 2: Proportional abundance of the resistome and microbiota in untreated (R) and treated (T) HWW, UWW**  
125 **and MWW, as well as river samples up (Ri) and downstream (Ri1 and Ri2) of the urban waste water release pipe**  
126 **throughout the sampling period (2012-2015). a: proportional abundance of resistome (ARG classes, heavy metals**  
127 **integrons and mobile genetic elements) for all samples. b: proportional abundance of the microbiota (displaying the**  
128 **20 most abundant bacteria at the order level for all samples, where “others” represents the percentage of the**  
129 **remaining taxa).**

130 **Temporal dynamics of H and U WW:** Redundancy analysis was performed in order to assess putative  
131 significant influences of time on the variability of resistome and microbiota compositions using sampling  
132 year or season as independent variables (Monte Carlo (MC) permutations (n=499)). Analysis was carried  
133 out for all different sample groups together (untreated U, H, M WW and treated U, H, M WW) to  
134 potentially identify general patterns influencing all groups at the same time. The same analysis was also  
135 performed per individual sample group (untreated and treated H, U and M WW alone, respectively).

136 For untreated HWW and UWW, neither year ( $p=0.6$  resistome and  $p=0.4$  microbiota respectively)  
137 nor season ( $p=0.9$  and  $p=0.3$ ) had a significant impact on the resistome (resistance gene classes) and  
138 microbiota composition of the WW over the first 3 years before mixing (Supplementary Table 1a).  
139 However, by analyzing the sample groups separately, a yearly and seasonal impact on the level of  
140 individual resistance genes in HWW was demonstrated ( $p=0.004$  year,  $p=0.032$  season; Supplementary  
141 Table 1b). Redundancy analysis revealed the relationship between individual genes and gene classes with  
142 seasons, pointing towards a correlation of increased normalized abundance of individual genes and gene  
143 classes detected during summer season (Supplementary Figure 3a, Supplementary Figure 4). The fact that  
144 the hospital was only installed in February 2012<sup>28</sup> may explain why the year 2012 is particular for HWW  
145 resistome, with overall lower normalized abundance of the resistome and no obvious trend towards the  
146 summer season in 2012. After HWW and UWW mixing (in 2015), no significant variation for the resistome  
147 and microbiota composition throughout the seasons could be observed considering all sample groups  
148 (untreated MWW, HWW and UWW;  $p=0.6$  resistome and  $p=0.07$  microbiota respectively).

149 For treated WW, the analysis exhibited more variation of the resistome and microbiota  
150 composition compared to the untreated sources over the years (2012-2014 for H and U WW; Figure 2,  
151 Supplementary Table 1c). Redundancy analysis revealed that in particular the microbiota of treated H and  
152 U WW effluents varied between the years ( $p=0.016$  for all groups,  $p=0.021$  for treated HWW and  $p=0.006$   
153 for treated UWW, Supplementary Table 1d) while no significant seasonal impact could be observed. The  
154 resistome varied between the years for treated HWW on both the gene class and the individual gene  
155 levels ( $p=0.004$  and  $p=0.012$ , Supplementary Table 1d), whereas for the treated UWW this variation was  
156 only significant on the individual gene level ( $p=0.028$ ). For the treated mixed WW (MWW), significant  
157 seasonal variation was observed for the microbiota composition ( $p=0.02$ ), while for the resistome no  
158 significant variation could be observed.

159 **The untreated HWW resistome is significantly diluted by UWW in mixed WW.** The bacterial biomass  
160 (absolute copy numbers of 16S rRNA genes per liter of water) was comparable for the untreated WW  
161 sources (HWW, UWW and MWW) (Supplementary Figure 5). Exemplary, here ratios of HWW over UWW



162 and HWW over MWW were calculated based on the averaged cumulative abundance of the resistome in  
163 untreated HWW and UWW (Table 1).

164 The untreated HWW contained significantly more gene classes compared to the untreated UWW,  
165 between 3 (transposase genes) and 161-fold (*qnr* genes encoding quinolone resistance) higher ( $p$  values  
166  $\leq 0.004$ ). When WW were mixed at the experimental ratio of 1:2 (HWW:UWW), the untreated MWW  
167 contained significantly less resistance gene classes compared to untreated HWW, between 3 and 22-fold  
168 lower ( $p$  values  $\leq 0.03$ ). Interestingly, there was no significant difference for the genes encoding resistance  
169 to macrolides for both HWW over UWW and HWW over MWW comparisons (Table 1, Figure 3a and 3b).  
170 The only resistance gene significantly lower in HWW compared to UWW or MWW ( $p < 0.0001$ ), was the  
171 streptogramin resistance gene *vatB*. The *mecA* gene encoding resistance to methicillin was undetectable  
172 in all UWW and in all but one MWW samples.

173 Altogether, these data indicate a significant dilution impact of UWW on the normalized abundance of the  
174 targeted resistome of HWW when mixing at the experimental ratio of 1:2 (HWW:UWW).

175

176 **Table 1:** Average fold changes for gene classes cumulative abundance of untreated HWW over UWW (2012-2015;  
 177 significant differences indicated by asterisk \*;  $p$  values  $\leq 0.004$ ) and HWW over MWW (2015, significant differences  
 178 indicated by asterisk \*;  $p$  values  $\leq 0.03$ )  $\pm$  Standard Deviation. Significant differences were calculated by comparing  
 179 the normalized cumulative abundance values of individual gene classes for all samples belonging to each sample  
 180 group using the non-parametric Mann-Whitney test. Fold changes were calculated for individually paired samples  
 181 for each gene class / sample group. NA indicates that gene classes were undetectable in either one or both of the  
 182 sample groups.

| Gene classes conferring resistance to:             | Fold change untreated Hospital WW/Urban WW | Fold change untreated Hospital WW/Mixed WW  |
|----------------------------------------------------|--------------------------------------------|---------------------------------------------|
| <i>chloramphenicol</i>                             | 84 ( $\pm 93$ )*                           | 13 ( $\pm 11$ )*                            |
| <i>aminoglycosides</i>                             | 43 ( $\pm 31$ )*                           | 8 ( $\pm 6$ )*                              |
| <i>bacitracin</i>                                  | 8 ( $\pm 13$ )*                            | 7 ( $\pm 4$ )*                              |
| <i>beta-lactams</i>                                | 26 ( $\pm 22$ )*                           | 9 ( $\pm 6$ )*                              |
| <i>macrolides</i>                                  | 1 ( $\pm 1$ )                              | 0.6 ( $\pm 0.3$ )                           |
| <i>(multi-drug) Efflux</i>                         | 9 ( $\pm 11$ )*                            | 4 ( $\pm 4$ )*                              |
| <i>quinolones (qnr)</i>                            | 161 ( $\pm 326$ )*                         | 10 ( $\pm 8$ )*                             |
| <i>heavy metals</i>                                | 7 ( $\pm 9$ )*                             | 4 ( $\pm 3$ )*                              |
| <i>quaternary ammonium compounds QACs)</i>         | 18 ( $\pm 14$ )*                           | 7 ( $\pm 4$ )*                              |
| <b>vancomycin</b>                                  | 12 ( $\pm 35$ )*                           | 18 ( $\pm 20$ )*                            |
| <i>tetracycline</i>                                | 4 ( $\pm 3$ )*                             | 3 ( $\pm 2$ )*                              |
| <i>polymixin</i>                                   | 8 ( $\pm 9$ )*                             | 4 ( $\pm 4$ )*                              |
| <i>sulphonamides</i>                               | 19 ( $\pm 12$ )*                           | 7 ( $\pm 4$ )*                              |
| <i>methicillin</i>                                 | NA (undetectable in UWW)                   | NA (undetectable in all but one MWW sample) |
| <i>streptogramin</i>                               | 0.2 ( $\pm 0.2$ )*                         | 0.2 ( $\pm 0.2$ )*                          |
| <i>trimethoprim</i>                                | 8 ( $\pm 6$ )*                             | 5 ( $\pm 3$ )*                              |
| <b>Gene classes grouped according to function:</b> |                                            |                                             |
| <i>transposase genes (MGEs)</i>                    | 3 ( $\pm 1$ )*                             | 2 ( $\pm 1$ )                               |
| <i>integron integrase genes</i>                    | 16 ( $\pm 9$ )*                            | 6 ( $\pm 3$ )*                              |

183  
 184 **Resistome reduction through WW treatment.** The bacterial biomass (copies of 16S rRNA / liter) for all  
 185 WW sources was decreased by 2-3 log after WW treatment (Supplementary Figure 5). To estimate the  
 186 impact of WW treatment on the resistome, fold changes of untreated over treated H, U and M WW were  
 187 calculated. The normalized cumulative abundance of all gene classes significantly decreased and was  
 188 between 78 times (for genes conferring resistance to quinolones) and 5 times (for genes conferring  
 189 resistance to QACs, sulphonamides and genes encoding transposase genes) lower in the treated HWW  
 190 compared to untreated HWW ( $p < 0.003$ ) (Table 2; Figure 3a and 3b). When comparing untreated UWW to  
 191 treated UWW, we showed a significant reduction ( $p < 0.05$ ) in the normalized cumulative abundance for 9  
 192 resistance gene classes with fold changes between 43 (for the streptogramin resistance gene *vatB*) and 3  
 193 (for genes encoding resistance to aminoglycosides) times (Table 2, Figure 3a and 3b). No significant  
 194 reduction was observed after treatment of UWW for gene classes conferring resistance to bacitracin,  
 195 beta-lactams, quinolones, heavy metals and quaternary ammonium compounds, and for genes encoding  
 196 integron integrases. Surprisingly, sulphonamide resistance encoding genes were found to be significantly  
 197 enriched after UWW treatment ( $p < 0.05$ ) (Table 2, Figure 3a and 3b). For MWW, a similar removal efficacy

198 as for UWW could be observed (Table 2, Fig. 3b), with significant decrease for the normalized cumulative  
 199 abundance of 10 genes classes and with fold changes between 41 (for the streptogramin resistance gene  
 200 *vatB*) and 3 (for the genes encoding integron integrase genes) times. No significant decrease for gene  
 201 classes conferring resistance to bacitracin, beta-lactams, tetracycline, heavy metals, QACs and  
 202 sulphonamides could be detected.

203

204 **Table 2:** Average fold changes for gene classes of untreated WW over treated WW for H, U and M WW ( $p$  values  $\leq$   
 205 0.03)  $\pm$  Standard Deviation. \*= significantly lower; + = significantly higher. Significant differences were calculated by  
 206 comparing the normalized cumulative abundance values of individual gene classes for all samples belonging to each  
 207 sample group using the non-parametric Mann-Whitney test. Fold changes were calculated for individually paired  
 208 samples for each gene class / sample group. Average fold change  $\pm$  Standard Deviation are depicted in the table for  
 209 comparison. NA indicates that gene classes were undetectable in either one or both of the sample groups.

| Gene classes conferring resistance to:             | Fold change H untreated WW/H treated WW                 | Fold change U untreated WW/U treated WW                 | Fold change M untreated WW/M treated WW               |
|----------------------------------------------------|---------------------------------------------------------|---------------------------------------------------------|-------------------------------------------------------|
| <i>chloramphenicol</i>                             | 34 ( $\pm 47$ )*                                        | 5 ( $\pm 12$ )*                                         | 16 ( $\pm 27$ )*                                      |
| <i>aminoglycosides</i>                             | 15 ( $\pm 14$ )*                                        | 3 ( $\pm 5$ )*                                          | 7 ( $\pm 10$ )*                                       |
| <i>bacitracin</i>                                  | 12 ( $\pm 30$ )*                                        | 1 ( $\pm 2$ )                                           | 1 ( $\pm 1$ )                                         |
| <i>beta-lactams</i>                                | 30 ( $\pm 42$ )*                                        | 4 ( $\pm 14$ )                                          | 10 ( $\pm 21$ )                                       |
| <i>erythromycin (macrolides)</i>                   | 48 ( $\pm 68$ )*                                        | 27 ( $\pm 55$ )*                                        | 23 ( $\pm 17$ )*                                      |
| <i>(multi-drug) efflux</i>                         | 29 ( $\pm 43$ )*                                        | 9 ( $\pm 27$ )*                                         | 13 ( $\pm 17$ )*                                      |
| <i>quinolones</i>                                  | 78 ( $\pm 123$ )*                                       | 3 ( $\pm 5$ )                                           | 19 ( $\pm 29$ )*                                      |
| <i>heavy metals</i>                                | 15 ( $\pm 32$ )*                                        | 3 ( $\pm 3$ )                                           | 2 ( $\pm 2$ )                                         |
| <i>quaternary ammonium compounds QACs</i>          | 5 ( $\pm 5$ )*                                          | 1 ( $\pm 2$ )                                           | 2 ( $\pm 2$ )                                         |
| <i>vancomycin</i>                                  | NA (undetectable in all but one sample for treated HWW) | NA (undetectable in all but one sample for treated UWW) | NA (undetectable in all samples for treated MWW)      |
| <i>tetracycline</i>                                | 51 ( $\pm 77$ )*                                        | 13 ( $\pm 40$ )*                                        | 6 ( $\pm 5$ )                                         |
| <i>polymixin</i>                                   | 29 ( $\pm 52$ )*                                        | 5 ( $\pm 12$ )*                                         | 7 ( $\pm 7$ )*                                        |
| <i>sulphonamides</i>                               | 5 ( $\pm 6$ )*                                          | 1 ( $\pm 1$ )*                                          | 2 ( $\pm 1$ )                                         |
| <i>Streptogramin</i>                               | 17 ( $\pm 43$ )*                                        | 43 ( $\pm 77$ )*                                        | 41 ( $\pm 20$ )*                                      |
| <i>methicillin</i>                                 | NA (undetectable in all treated HWW samples)            | NA (undetectable in all treated UWW samples)            | NA (undetectable in all but one untreated MWW sample) |
| <i>trimethoprim</i>                                | 66 ( $\pm 101$ )*                                       | 9 ( $\pm 28$ )*                                         | 6 ( $\pm 7$ )*                                        |
| <b>Gene classes grouped according to function:</b> |                                                         |                                                         |                                                       |
| <i>transposase genes (MGEs)</i>                    | 5 ( $\pm 5$ )*                                          | 6 ( $\pm 7$ )*                                          | 5 ( $\pm 3$ )*                                        |
| <i>integron integrase genes</i>                    | 7 ( $\pm 6$ )*                                          | 1 ( $\pm 1$ )                                           | 3 ( $\pm 4$ )*                                        |

210

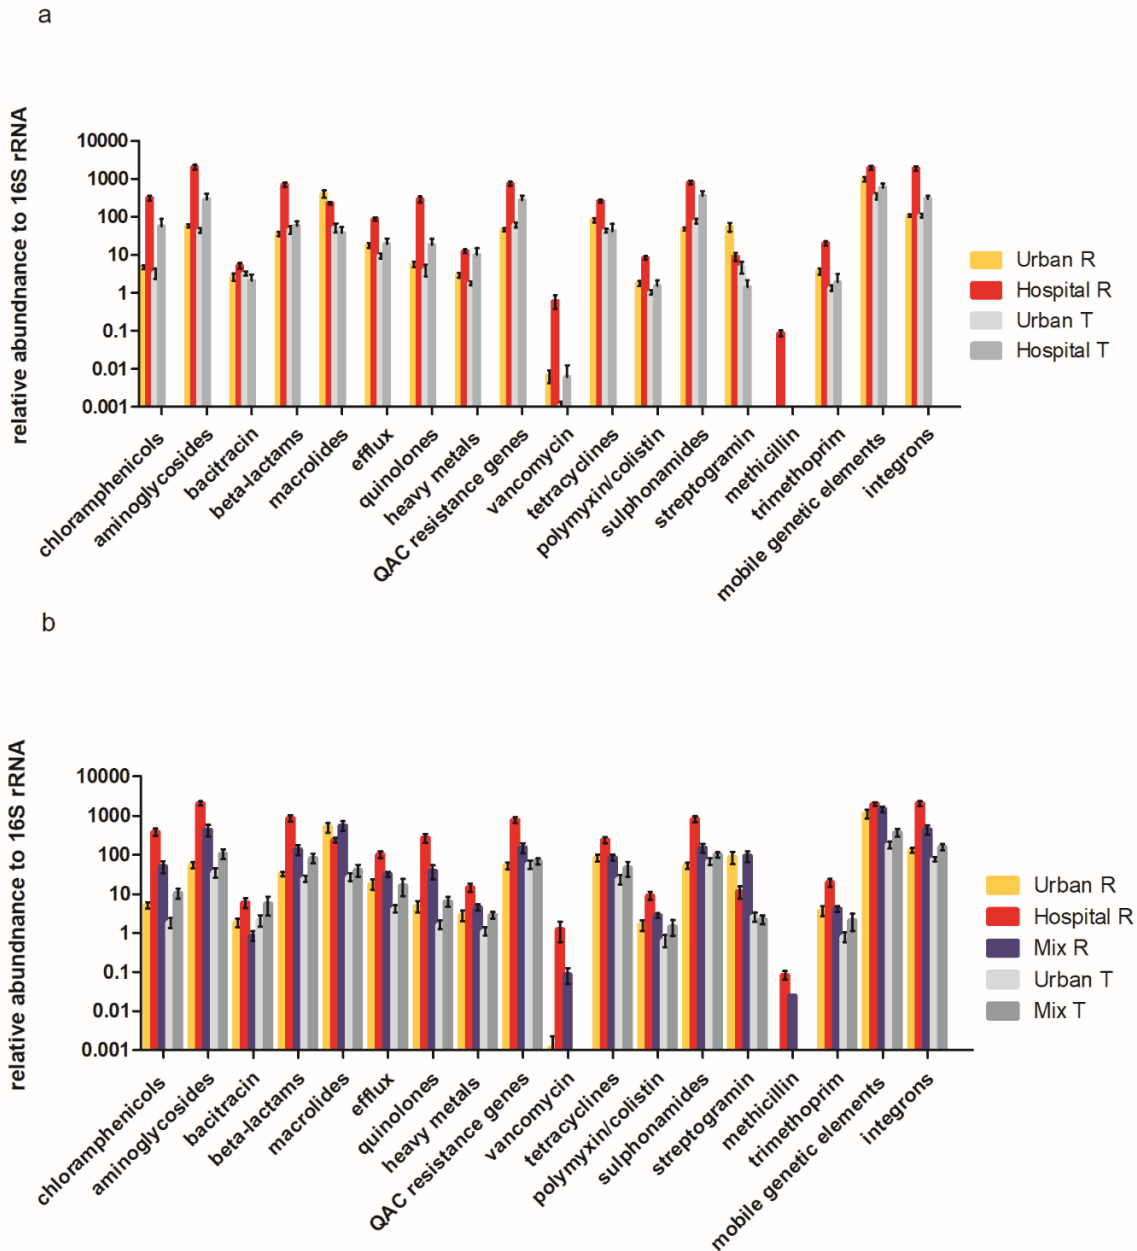

211  
 212 **Figure 3: Averaged normalized abundance of ARG classes, heavy metals, MGEs and integrons over all collected**  
 213 **samples per sample type +- standard deviation. a:** relative abundance of ARG classes, heavy metals, QACs, MGEs  
 214 and integrase genes in untreated (n=21) and treated HWW (n=19), untreated (n=21) and treated (n=20) UWW  
 215 averaged over the numbers of samples collected for each water type in the given time interval (March 2012 –  
 216 December 2014) +- standard deviation. **b:** averaged normalized abundance of ARG classes, heavy metals, QACs,  
 217 MGEs and integrase genes in untreated (n=10) HWW, untreated (n=9) and treated (n=8) UWW and untreated (n=10)  
 218 and treated (n=8) MWW (at the experimental ratio of 1/3 HWW to 2/2 UWW) WW samples averaged over the  
 219 numbers of samples collected for each sample group in the given time interval (January 2015- November 2015) +-  
 220 standard deviation.

221 **No evident impact of treated hospital WW on the receiving river.** We also analyzed 12 river samples up  
222 and downstream the WWTP to evaluate putatively associated risks with the release of the treated WW  
223 into the effluent receiving river and downstream environment (Supplementary Figure 6). The resistome  
224 for the river samples collected for the sites up (Ri) and downstream (Ri1 and Ri2) of the effluent release  
225 pipe during winter season 2013 was not significantly different for either of the three sampling sites  
226 (Supplementary Figure 6). There was no significant difference of the relative abundance for any of the  
227 detected gene classes in the river samples compared to treated UWW. On the contrary, the relative  
228 abundance of nine resistance gene classes including genes encoding MGEs and integron integrases was  
229 significantly lower ( $p < 0.04$ ) in river samples when compared to treated HWW (Supplementary Figure 6).

230 **Human gut bacteria are enriched in HWW.** The human gut microbiota is an important reservoir of ARGs<sup>29-</sup>  
231 <sup>31</sup> and bacteria of the human gut are likely to be shed into the environment via wastewaters that contain  
232 at least partially human feces. We calculated the relative abundance of anaerobic human gut bacteria, as  
233 well as Enterobacteriales in the respective WW. Enterobacteriales were specifically detected as many of  
234 these Gram-negative bacteria are also pathogens. The orders Clostridiales, Bifidobacteriales and  
235 Bacteroidales which represent the most important and abundant anaerobic human gut bacteria<sup>32,33</sup>, were  
236 grouped together and are referred to as anaerobic human gut bacteria. Untreated HWW contained  
237 significantly higher levels of anaerobic human gut bacteria ( $38\% \pm 11$  standard deviation) and  
238 Enterobacteriales ( $2\% \pm 1.5$ ) compared to all other samples (Figures 4a and 4b). Interestingly, these orders  
239 are comparable in their relative abundance for untreated UWW and MWW, indicating a significant  
240 dilution effect of UWW in HWW (Figure 4b), as observed for the resistome. The treatment allowed a  
241 significant ( $p < 0.05$ ) decrease of the relative abundance of these orders for HWW and UWW (Figure 4a  
242 and 4b) whereas the reduction for MWW was only marginally significant ( $p = 0.05$ ) (Figure 4b).

243

244

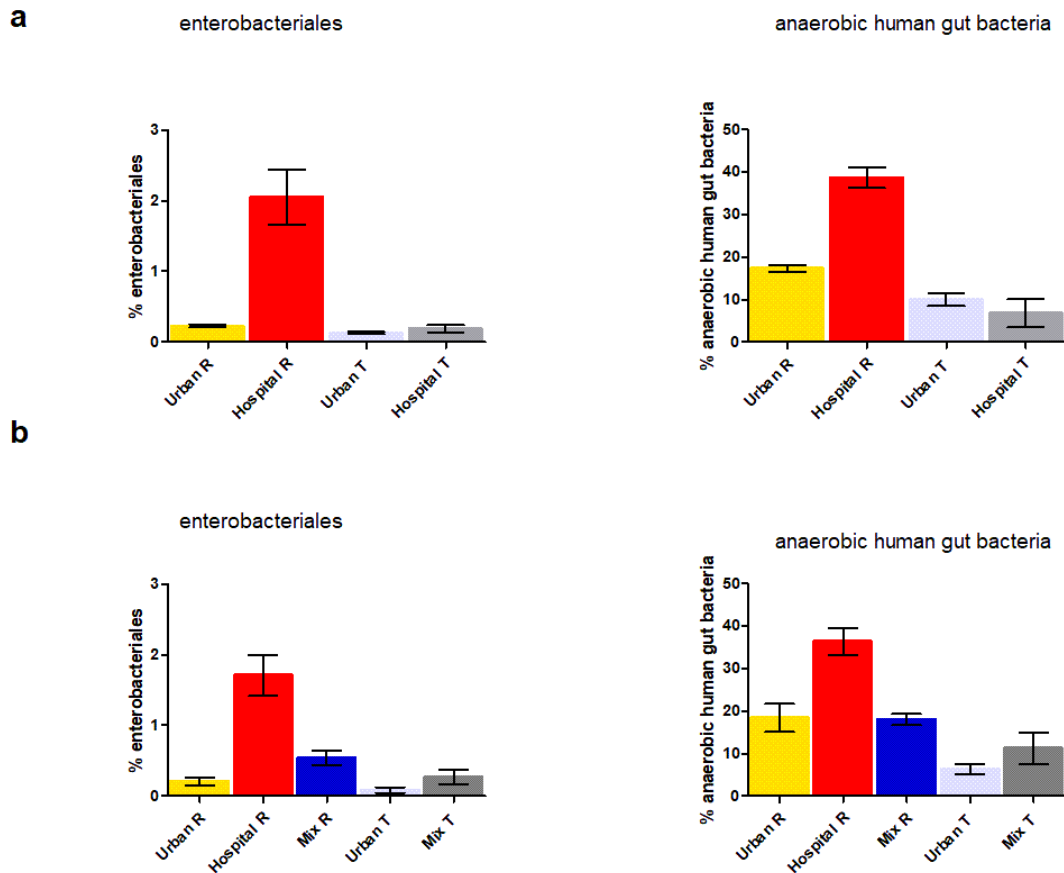

245

246 **Figure 4: a: Relative abundance of anaerobic human gut bacteria (Clostridiales, Bifidobacteriales and**  
247 **Bacteroidales) and Enterobacteriales** in untreated (n=21) and treated HWW (n=19), UWW (n=21) and (n=20)  
248 averaged over the numbers of samples collected for each sample group between March 2012 and December 2014  
249 +- standard deviation. **b: relative abundance of anaerobic human gut bacteria and Enterobacteriales** in untreated  
250 (n=10) HWW, untreated (n=9) and treated (n=8) UWW and untreated (n=10) and treated (n=8) MWW samples (at  
251 the experimental ratio of 1:2 HWW:UWW) averaged over the numbers of samples collected for each sample group  
252 between January 2015 and November 2015 +- standard deviation.

253

254 **The eco-exposome plays an important role in shaping the resistome and microbiota in hospital and**  
255 **urban WW.** In order to estimate chemical and heavy metal pollution (the eco-exposome) in the WW,  
256 selected pharmaceutical compounds (including antibiotics), surfactants and heavy metals were quantified  
257 in untreated WW (Supplementary Table 2).

258 The relationship between the resistome/microbiota and the eco-exposome was visualized by  
259 means of PCA biplots. Here, HWW and UWW form two distinct clusters, while the MWW clusters closely  
260 to the UWW for both resistome and microbiota (Figure 5a and 5b). Pharmaceuticals, non-ionic and

261 cationic surfactants are the most important contributors to the respective HWW resistome and  
262 microbiota (length of arrows), while anionic surfactants and some metals play a more dominant role in  
263 driving the resistome and microbiota of the UWW (Fig. 5a and 5b). Moreover, the putative impact of the  
264 measured chemicals (eco-exposome) on the microbiota and resistome was statistically assessed by RDA.  
265 The results of the Monte-Carlo permutations indicated that the eco-exposome significantly influences the  
266 resistome and microbiota (p-values 0.002).

267 Finally, a variation partitioning analysis was performed to study which group of the measured  
268 chemicals (heavy-metals, pharmaceuticals, surfactants) might have a larger contribution on the resistome  
269 and microbiota variation, and to explore whether the interaction between these compounds has a  
270 stronger influence than the individually grouped compounds (Figure 5c and 5d). Pharmaceuticals (the  
271 antibiotics ciprofloxacin, sulfamethoxazole and vancomycin, and the neurological drug carbamazepine)  
272 explain the largest proportion of the variance for the resistome, while the surfactants have the largest  
273 impact on the variation for the microbiota. Finally, we show that the interaction between pharmaceuticals  
274 and surfactants contributes more to the variability in the resistome than the individual compounds alone,  
275 while such interactions are less clear in the microbiota dataset (Fig. 5c and 5d). We also collected data  
276 on the consumption of three antibiotics, ciprofloxacin, sulfamethoxazole and vancomycin, by the hospital  
277 pharmacy over the period of 2012 to 2014, that were summarized here as gram per season  
278 (Supplementary Table 3 and Supplementary Figure 3c). The studied hospital site has just been opened in  
279 the winter month February 2012 which is probably why antibiotic consumption by the hospital pharmacy  
280 was low during winter 2012. No obvious correlation between summer peaks for the measured antibiotics  
281 in WW and their respective consumption by the hospital pharmacy was shown. (Supplementary Tables 3  
282 and 4, and Supplementary Figure 3b and 3c). The observed peaks and variation during summer season for  
283 individual resistance genes and gene classes in HWW (Supplementary Figures 3a and 4) may be due to dry  
284 season during summer that could result in decreased flow rate of HWW, and also account for the  
285 measured peaks for the antibiotics in HWW during summer (Supplementary Figure 3b).

286

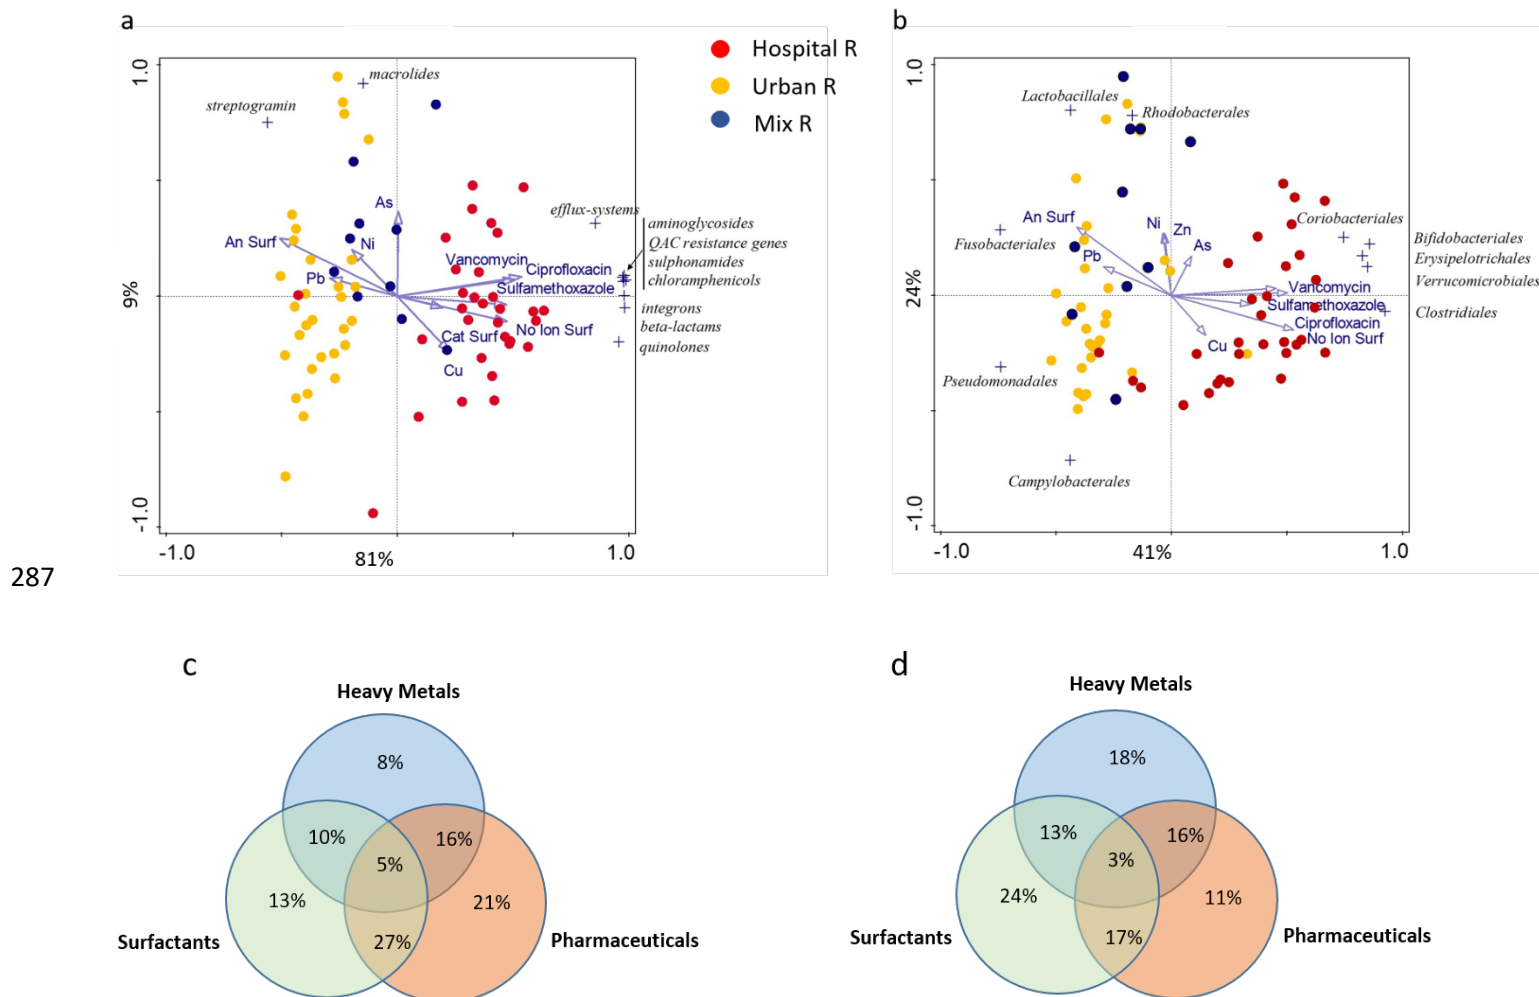

288  
 289 **Figure 5: Principal component analysis showing the relationship between the eco-exposome (heavy**  
 290 **metals, pharmaceuticals and surfactants) and the resistome (a) and microbiota (b) of untreated HWW,**  
 291 **UWW and MWW samples; and Venn diagrams showing the results of the variation partitioning analysis**  
 292 **with the different measured chemical classes and the resistome (c) and microbiota (d). In the PCA**  
 293 **analysis, dots refer to urban (yellow), hospital (red) and mixed (blue) untreated WW samples.**

294



## 295 Discussion

296 In the context of globally increasing AMR, wastewaters (WW) have been identified as sources for the  
297 spread of AMR determinants (ARB, ARGs, MGEs) and chemical pollutants (often pharmaceutical residues)  
298 that may favor AMR selection during wastewater treatment and in the receiving environment. In this  
299 study we thoroughly monitored the resistome and microbiota dynamics of untreated and treated  
300 (applying conventional secondary WWT) hospital and urban WW over four years throughout the seasons  
301 in France. We identified distinct and robust resistome and microbiota signatures, in particular for  
302 untreated HWW and UWW, indicating that HWW and UWW form distinct and stable ecological niches  
303 over time. Performing machine learning (ML), taking the full data set into account, as well as separate  
304 data-sets from the different WW sources before and after treatment, classified each of the sources with  
305 high accuracy and revealed top predictive genes, gene classes and taxa for the respective WW sources  
306 before and after WW treatment (Supplementary Figure 8). Interestingly, when collapsing data-sets  
307 obtained from untreated and treated samples of the respective WW sources, ML was able to predict HWW  
308 and UWW in general with more than 93% certainty on all predictor levels (individual genes, gene classes,  
309 taxa) (Supplementary Figure 9). These top 10 predictors for HWW and UWW (Supplementary Figure 8 and  
310 9) provide considerable marker gene classes, individual genes and taxa for the respective WW sources  
311 that indicate underlying important differences in risk to the environment and that present targets for the  
312 monitoring and management of HWW and UWW. A recent study assessed the removal efficacy of 62  
313 Dutch wastewater treatment plants (WWTPs), applying conventional secondary WW treatment, on a  
314 selected panel of six ARGs and the gene encoding the class 1 integrase gene<sup>15</sup>. These genes (*emrB*, *sul1*  
315 and *sul2* (in our study synonym with *sulA*), *qnrS*, *tetM*, *blaCTX-M* and *intI*), proposed as general WW  
316 markers for risk assessment<sup>5</sup>, were also monitored by our resistome approach and were similarly classified  
317 as high predictors for the respective WW sources (Supplementary Figure 7, 8 and 9). All seven genes were  
318 detected in both WW sources, however in different normalized abundances (e.g. *ermB* was more  
319 abundant in UWW compared to HWW, whereas the genes *sul1*, *sul2*, *qnrS*, *blaCTX-M* and *intI1* were more  
320 abundant in HWW; interestingly the normalized abundance of *tetM* was comparable in both sources). We  
321 were also able to identify additional genes that could be implemented for the classification of HWW vs  
322 UWW based on their normalized abundance. For example, the streptogramin resistance gene *vatB*, and  
323 the transposase gene *ISS1N* were significantly more abundant in UWW compared to HWW, and seem to  
324 be specifically indicative for UWW.

325 The HWW resistome was found to be significantly enriched with resistance gene classes and genes  
326 encoding integron integrase genes compared to UWW except for the streptogramin resistance gene *vatB*.

327 For the gene class conferring resistance to macrolides, we did not observe a significant difference between  
328 HWW and UWW; however, there is a trend for the *ermB* gene to be higher in UWW than in HWW (Figure  
329 3a and 3b; Table 1). Thus, macrolide resistance genes also contribute to the specific resistome signature  
330 for UWW. Considering the fact that macrolide and streptogramin antibiotics are more frequently  
331 prescribed in the community compared to the hospital environment in France, could explain the high  
332 abundance of these gene classes in UWW<sup>18</sup>. In the hospital environment, antibiotics such as quinolones,  
333 beta-lactams, aminoglycosides and vancomycin are frequently used, which also could explain the  
334 relatively high abundance of gene classes conferring resistance to those antibiotics in HWW compared to  
335 UWW<sup>18</sup>. Furthermore, we measured in high concentrations the antibiotics ciprofloxacin,  
336 sulfamethoxazole and vancomycin in HWW, which points towards a relationship of the measured  
337 antibiotics and the detected resistome in HWW (Figure 5a and c). Interestingly, the *qnr* genes encoding  
338 quinolone resistance in HWW were the ones with the highest fold increase (161-fold) between HWW and  
339 UWW. As these genes are located on plasmids, their higher abundance in HWW indirectly reflects the  
340 likely abundance of bacteria harboring genetic elements involved in resistance dissemination as plasmids  
341 in HWW. Indeed, *qnr* genes have been described mainly in Enterobacteriales<sup>34,35</sup> and we found that the  
342 quantity of Enterobacteriales is higher in HWW than in UWW (Figure 4).

343 The human gut microbiota is an important reservoir for ARGs<sup>30,31</sup> and recently evidence-based data  
344 showed that the occurrence and abundance of (human) fecal pollution is a likely explanation for the  
345 detection of high amounts of ARGs in anthropogenically impacted environments<sup>36,37</sup>. The significant  
346 dilution of human gut bacteria in MWW observed here, is hence likely to explain the significant reduction  
347 of the abundance of gene classes after mixing HWW with UWW.

348 A significant dilution of HWW-associated genes in UWW was described previously, but under  
349 circumstances that reflected a much lower rate of contribution of HWW to UWW (between 0.8 and 2.2%)  
350 at the respective study sites<sup>9,15,21</sup> compared to our study site (here HWW ~33.4%). This shows that UWW  
351 can modify and dilute the abundance of resistance genes, MGEs and integrons in untreated HWW,  
352 significantly, even with an increased proportional contribution of HWW to UWW. The increase of the  
353 effluent flow rate entering in the WWTP treating the MWW due to the injected UWW may contribute  
354 largely to the observed significant dilution impact of the UWW on the HWW.

355 Previous studies conducted on the same experimental site for shorter time periods (up to 2 years)  
356 coherently provided a detailed catalogue of pharmacological parameters, such as specific surfactants, that  
357 could further aid to discriminate UWW from HWW<sup>28,38-40</sup>. They also concluded that there is no greater  
358 advantage associated with separate treatment of HWW from UWW with respect to their pharmaceutical

359 discharges and ecotoxicological impacts<sup>28</sup>. However, the fact that the normalized abundance of six gene  
360 classes did not significantly decrease in UWW after UWW treatment (bacitracin, beta-lactams, quinolones,  
361 heavy metals and quaternary ammonium compounds, and for genes encoding integron integrases) and  
362 that one gene class (sulphonamides) even significantly increased in normalized abundance (Table 2, Fig  
363 3a and Fig 3b) suggests that secondary WW treatment in general may not be sufficient in preventing the  
364 dissemination of AMR in the downstream environment. The removal efficacy of secondary WW treatment  
365 in terms of absolute abundance of ARGs and ARBs is significant by reducing the overall release of ARGs  
366 and ARB into the downstream environment in general by more than 95%<sup>15</sup>. However, unchanged, or even  
367 increased relative (in terms of copies per liter ARGs / copies per liter bacterial 16S rRNA) or normalized  
368 abundance (in terms of Ct value ARGs/ Ct value 16S rRNA as in this study) of ARGs and gene classes is  
369 indicative for selective processes during secondary WW treatment favoring the spread of AMR into the  
370 environment<sup>15,41-43</sup>. The resistome monitored here, exhibits a high mobilization potential due to the high  
371 proportion of MGEs, integrons and plasmid borne ARGs detected in all WW samples, as well as in the  
372 receiving river waters (Figure 1, MGEs and integrons account for up to 60% of the resistome of treated  
373 effluents and river waters). The MGEs, more specifically transposase genes targeted here, represent genes  
374 that are associated with the dissemination of ARGs by means of conjugative integrative elements or  
375 plasmids, across environmental bacteria and human pathogens<sup>26,41</sup>. There is evidence that advanced WWT  
376 such as disinfection by UV radiation or ozone treatment, or physical treatment by ultrafiltration of WW  
377 are more efficient in reducing ARB and ARGs compared to conventionally applied secondary WW  
378 treatment. However, despite reducing ARB and ARG loads significantly compared to secondary treatment  
379 often ARBs and ARGs are not completely eliminated by advanced WWT either<sup>44</sup>.

380 The exposome, a term originally coined in the context of human health epidemiology and referring to “the  
381 totality of human environmental exposures”<sup>45</sup>, here specifically refers to the chemical compounds  
382 quantified in our longitudinal study that represent partially the environmental or “eco-exposome”<sup>46</sup> of  
383 the WW microbiota. Anthropogenic pollution through micro pollutants present in WW (particularly  
384 surfactants, antibiotics and heavy metals) has shown to have a negative impact on the environment and  
385 significantly shape the terrestrial and aquatic microbial ecosystems<sup>8,47-50</sup>. For example, high  
386 concentrations of antibiotics and cationic surfactants found in HWW<sup>17,51,52</sup>, and pharmaceutical  
387 production sites<sup>53,54</sup> have been correlated with a higher abundance of ARBs, ARGs, as well as higher  
388 abundance of MGEs and integrons<sup>17,21,55</sup>, whereas anionic surfactants that are generally abundant in urban  
389 WW effluents (untreated and treated UWWs; “grey waters”) are associated with toxicity to aquatic and  
390 terrestrial environments<sup>56-58</sup>. Here, multivariate analysis (Figure 5) revealed a significant impact of the

391 eco-exposome on the resistome and microbiota signatures of all investigated WW sources. We observed  
392 that cationic surfactants and antibiotics are specifically linked to HWW (Figure 5), which reflects the  
393 frequent use of antibiotics and active-surface agents as quaternary ammonium compounds in hospitals.  
394 Interestingly, we also found that *qac* genes that encode resistance to quaternary ammonium compounds  
395 are significantly higher in HWW than in UWW. The urban WW eco-exposome on the other hand was found  
396 to be enriched with anionic surfactants (Supplementary Table 2) which in turn were found to be  
397 specifically linked to the UWW and MWW resistome and microbiota (Figure 5). This suggests that anionic  
398 surfactants detected in UWWs do have an important impact on the resistome and microbiota of UWWs,  
399 in addition to other pharmaceuticals and antibiotics. Specific measures to reduce the emission of  
400 surfactants into the environment by selective removal and improved WW treatment are currently  
401 discussed<sup>48</sup> and warrant further attention. In addition, further research needs to be done to illuminate  
402 the detailed mechanism of the synergetic effects of all compounds that make up the WW eco-exposome  
403 on shaping the resistome and microbiota of WW effluents and the downstream environment.

404 Overall, our findings demonstrate robust and distinct signatures for H and UWW over time, present  
405 important marker genes, gene classes and bacterial taxa that can be implemented for H and U WW  
406 monitoring. We also demonstrate that, on the scale of a small sized urbanized area, WW mixing of U and  
407 HWW bears no greater risk than separate treatment and that the eco-exposome (pharmaceuticals, heavy  
408 metals and surfactants measured here) plays a significant role in shaping WW resistome and microbiota.

409               The global public health threat due to the rise of AMR was greatly accelerated by  
410 human activity and is considered to be a direct consequence of extensive use of antibiotics in clinical,  
411 veterinary and urban settings. Human mediated chemical pollution released into the environment also  
412 significantly accounts for the loss of biodiversity, which in turn has eco-evolutionary impacts that may  
413 compromise the sustainability of human society<sup>59</sup>. These facts urgently call for global integrative measures  
414 and actions to lower the amount of ARGs, ARBs, MGEs and chemical micro-pollutants such as surfactants  
415 and pharmaceutical residues entering our environment through WW effluents. This gives further  
416 emphasis to the requirement of implementing and optimizing sanitation systems and operational WWTPs  
417 on a global level, particular in countries/continents with poor water sanitation infrastructure and  
418 correlated high occurrence of multi-resistant bacteria<sup>60</sup>. In addition, lowering the widespread use and  
419 applications of antibiotics and surfactants in clinical, veterinary, domestic and industrial settings through  
420 environmental policy making, could present an opportunity to lower the risk associated with WW  
421 effluents. Furthermore, and as highlighted in recent studies<sup>36,61,62</sup>, the elimination of pollution by means  
422 of human feces, and bacterial taxa associated, through advanced or selective WW treatment, may further

423 aid in limiting the release of ARGs associated with human gut bacteria and pathogens. Finally, the data  
424 generated by this study are of important interest to policy makers concerning the risks associated with H  
425 and U WW, their putative implication into the dissemination of AMR, and provide further evidence  
426 towards the necessity of environmental pollution management in the battle of AMR and other important  
427 global health factors such as the preservation of biodiversity and the prevention of climate change<sup>50</sup>  
428 (France national report: hyperlink:[https://www.tresor.economie.gouv.fr/Articles/a9782706-87a4-4cdc-](https://www.tresor.economie.gouv.fr/Articles/a9782706-87a4-4cdc-9a4c-86a72736315d/files/525144cc-24fb-4c93-aa5b-c67aefd3b40a)  
429 [9a4c-86a72736315d/files/525144cc-24fb-4c93-aa5b-c67aefd3b40a](https://www.tresor.economie.gouv.fr/Articles/a9782706-87a4-4cdc-9a4c-86a72736315d/files/525144cc-24fb-4c93-aa5b-c67aefd3b40a)).

430

431

## 432 Methods

### 433 Sampling and study design

434 126 Urban and hospital wastewater (UWW and HWW) samples were collected in Scientrier (Bellecombe  
435 WWTP), Haute-Savoie, France<sup>28</sup> as part of the multi-disciplinary project SIPIBEL. The study site was  
436 implemented as an observatory for untreated and treated hospital and UWW and to evaluate their impact  
437 (during separate and subsequently mixed treatment) on the environment (e.g. the effluent receiving  
438 river). The CHAL (Centre Hospitalier Alpes Léman) hospital opened in February 2012 and includes 450 beds  
439 (140 m<sup>3</sup>/d), whereas the Bellecombe WWTP was collecting UWW of approximately 21.000 inhabitants  
440 (5200 m<sup>3</sup>/d). For more details of the SIPIBEL project, study set up, WWT and sample collection refer to  
441 Chonova et al. 2018 and Wiest et al.<sup>28,38</sup>, and to Figure 1. The samples included in our study were collected  
442 in monthly intervals (untreated and treated samples) by flow proportional sampling, from March 2012  
443 through November 2015<sup>28</sup>. From March 2012 to December 2014, UWW and HWW were treated  
444 separately applying the same conventional (activated sludge) WWT<sup>28,38</sup>. Then, in the period from January  
445 2015 through November 2015, UWW was mixed into the HWW (1:2 ratio HWW:UWW, the ratio was fixed  
446 by a local operating constraint) and added to the separate HWW treatment line resulting in a controlled  
447 mixed WW (MWW)<sup>28</sup>. In addition, 12 water samples of the effluent receiving river up (river upstream) and  
448 downstream (river downstream sampling point 1 and 2) of the effluent release pipes have been collected  
449 during the winter months of 2013 (January, February, November, and December). Activated sludge  
450 samples have also been collected from both sludge basins throughout the sampling campaign. Due to  
451 different resident times and flow sizes of each wastewater treatment basin, sludge dynamics for resistome  
452 and microbiota were not directly comparable hence results will not be further discussed in this study. 16S  
453 rRNA sequence data from all samples, including sludge samples, are publicly available.

### 454 DNA isolation/ sample preparation

455 Water samples were filtered for microorganisms, using a filtration ramp (Sartorius,  
456 Göttingen, Germany), on sterile 47 mm diameter filter with pore size of 0.45 µm (Sartorius,  
457 Göttingen, Germany). Microorganisms were recovered from filters and subject to DNA isolation for  
458 downstream analysis, using the Power water DNA extraction kit (MoBio Laboratories Inc., Carlsbad, CA,  
459 USA). For sludge samples, 2 ml of sludge were pelleted, and DNA was extracted by following the protocol  
460 of the Fast DNA Spin kit for feces (MP Biomedicals, Illkirch, France). DNA concentration was determined  
461 by Qubit Fluoremetric Quantitation (Thermo fisher scientific, Waltham, MA USA) assays according the

462 manufacturer's instructions. All DNA samples were diluted or concentrated to a final concentration of 10  
463 ng/ $\mu$ l for downstream qPCR and 16S rRNA analysis.

#### 464 **High-throughput qPCR**

465 Nanolitre-scale quantitative PCRs to quantify levels of genes that confer resistance to antimicrobials and  
466 heavy metals were performed as described previously<sup>9,29</sup>, with some modifications in the collection of  
467 primers. The primer sequences and their targets are provided in the supplementary data (Supplementary  
468 Table 5). The primer set used in the qPCR assays covered 78 genes conferring resistance to antibiotics,  
469 quaternary ammonium compounds or heavy metals. This set includes genes encoding efflux pumps  
470 (referred to as 'efflux', Supplementary Table 6) leading to multi-resistance at once to different antibiotic  
471 families. We also added primers for genes encoding mobile genetic elements, namely nine transposase  
472 genes<sup>26,41</sup>, and the class 1, 2 and 3 integron integrase genes<sup>63</sup>. We also included primers targeting 16SrRNA  
473 encoding DNA. Primer design and validation prior and after Biomark analysis has been done as described  
474 earlier<sup>29</sup>. Real-Time PCR analysis was performed using the 96.96 BioMark™ Dynamic Array for Real-Time  
475 PCR (Fluidigm Corporation, San Francisco, CA, U.S.A), according to the manufacturer's instructions, with  
476 the exception that the annealing temperature in the PCR was lowered to 56°C. DNA was first subjected to  
477 14 cycles of Specific Target Amplification using a 50 nM mixture of all primer sets, excluding the 16S rRNA  
478 primer sets, in combination with the PreAmp Master Mix (100-5581, Fluidigm ), followed by a 5-fold  
479 dilution prior to loading samples onto the Biomark array for qPCR. Thermal cycling and real-time imaging  
480 was performed at the Plateforme Génomique GeT – INRA Transfert (<https://get.genotoul.fr/en/>), and Ct  
481 values were extracted using the BioMark Real-Time PCR analysis software.

#### 482 **Calculation of normalized abundance and cumulative abundance**

483 Normalized abundance of individual resistance genes was calculated relative to the abundance of the 16S  
484 rRNA gene (CTARG – CT16S rRNA) resulting in a log<sub>2</sub>-transformed estimate of gene abundance.  
485 Cumulative abundance was calculated for resistance gene classes based on the sum of the normalized  
486 abundance of individual ARGs. The differences in cumulative abundance over the indicated time periods  
487 (2012-2014; 2015 for mixed WW) are shown as an averaged fold-change  $\pm$  standard deviation. The non-  
488 parametric Mann-Whitney test was used to test for significance; p values were corrected for multiple  
489 testing by the Benjamin-Hochberg procedure (Benjamini & Hochberg, 1995) with a false discovery rate of  
490 0.05. Averaged normalized abundance data for allocated gene classes is provided in Supplementary Table  
491 7.



## 492 **qPCR to determine absolute copy numbers of 16S rRNA genes**

493 The qPCRs for the determination of 16S rRNA gene copy number as a proxy for the bacterial biomass was  
494 performed as described previously by Stalder et. *al.*<sup>21</sup>.

## 495 **16S rRNA gene sequencing and sequence data pre-processing**

496 Extracted DNA samples for 16S rRNA sequencing were prepared following a dual barcoded two-step PCR  
497 procedure for amplicon sequencing for Illumina. Primers of the first PCR step included universal CS1 and  
498 CS2 tags targeting the V4 region of the hypervariable region of the 16S rRNA gene using the 16SrRNA  
499 primer sequences of the earth microbiota project ([http://press.igsb.anl.gov/earthmicrobiota/protocols-  
500 and-standards/16s/](http://press.igsb.anl.gov/earthmicrobiota/protocols-and-standards/16s/)). During the second step of the PCR barcoded adapters suitable for multiplex illumina  
501 sequencing were added. Following pooling of the barcoded samples, the amplicon pool was cleaned to  
502 remove short undesirable fragments using Magbio HighPrep PCR beads (MagBio AC-60050), QC'ed on a  
503 High Sensitivity NGS Fragment Analyzer, and then qPCR quantified using the Kapa kit for ABI optical-  
504 cyclers. The pool was then normalized to 10nM, denatured using 0.1N NaOH followed by a 2min  
505 incubation @96C followed by 5min in an ice-water bath just prior to sequencing as per the Illumina  
506 protocol for a 2x301 MiSeq run (Illumina, Inc., San Diego, CA). DNA sequence reads from the Illumina  
507 MiSeq were demultiplexed and classified in the following manner: The Python application dbcAmplicons  
508 (<https://github.com/msettles/dbcAmplicons>) was used to identify and assign reads to the appropriate  
509 sample by both expected barcode and primer sequences. Barcodes were allowed to have at most 1  
510 mismatch (hamming distance) and primers were allowed to have at most 4 mismatches (Levenshtein  
511 distance) as long as the final 4 bases of the primer matched the target sequence perfectly. Reads were  
512 then trimmed of their primer sequence and merged into a single amplicon sequence using the application  
513 FLASH<sup>64</sup>. Finally, the RDP Bayesian classifier was used to assign sequences to phylotypes<sup>65</sup>. Reads were  
514 assigned to the first RDP taxonomic level with a bootstrap score >=50.

## 515 **16S rRNA data analysis**

516 Illumina MiSeq forward and reverse were processed using the MASQUE pipeline  
517 (<https://github.com/aghozlane/masque>). Briefly, raw reads are filtered and combined followed by  
518 dereplication. Chimera removal and clustering are followed by taxonomic annotation of the resulting  
519 OTUs by comparison to the SILVA database. A BIOM file is generated that combines both OTU taxonomic  
520 assignment and the number of matching reads for each sample. Relative abundance levels from bacterial  
521 taxa (Order level) were obtained and analyzed. The obtained relative abundance OTU tables (Order level)



522 were analyzed with Microsoft excel (Supplementary Table 8), multi-variate analysis package (see below)  
523 and by means of a machine learning approach employing a random forest algorithm (see below).

#### 524 **Chemical analysis**

525 All chemical data measured here and used for analysis were extracted from the SIPIBEL database. Solid-  
526 phase extraction (SPE) and liquid chromatography coupled with tandem mass spectrometry (LC-MS/MS)  
527 were used to measure the antibiotics ciprofloxacin, sulfamethoxazole and vancomycin and the  
528 pharmaceutical carbamazepine as detailed elsewhere<sup>26</sup>. Heavy metals (Zn, Cu, Ni, Pb, Cr, Gd, Hg, As and Cd)  
529 were measured with inductively coupled plasma combined with atomic emission spectroscopy (ICP-AES).  
530 Concentration of surfactants (anionic, cationic and non-ionic surfactants) were measured following  
531 standard methods approved by the French organization of standardization AFNOR as described by Wiest  
532 *et. al.*<sup>38</sup>.

#### 533 **Multivariate analyses**

534 Multivariate statistical techniques were used to test the influence of waste water treatment or sampling  
535 time (independent variables) on the microbiota and the resistome (dependent variables) of the different  
536 sample groups (urban, hospital, mixed), including all individual genes and genes allocated into gene  
537 classes in two independent datasets. Statistically significant influence of the treatment or the sampling  
538 time on the microbiota and the resistome were assessed by Redundancy Analysis (RDA) with 499 Monte  
539 Carlo permutations. For testing the influence of sampling time, we used sampling year or season as  
540 independent variables, and all different sample groups together (i.e., to potentially identify general  
541 patterns influencing all groups at the same time), and individually, as dependent variables. Such analysis  
542 revealed the percentage of variance that is explained by sampling time or WW treatment in each case,  
543 and whether the influence of the independent variables is statistically significant or not. The relationship  
544 between the resistome and the microbiota and the measured chemicals in the different raw water  
545 samples (eco-exposome) was visualized by means of Principal Component Analysis (PCA) biplots.  
546 Moreover, the influence of the measured chemicals (eco-exposome) on the microbiota and resistome was  
547 statistically assessed by RDA. A variation partitioning analysis was performed to assess which group of  
548 chemicals (Metals, Pharmaceuticals, Surfactants) explains the largest share of the variation of the  
549 microbiota and resistome datasets, and to explore whether the interactive effects of the groups of  
550 chemicals would have a larger influence on those datasets than the individual groups themselves. All  
551 multivariate analyses were performed with the Canoco v5.0 software<sup>66</sup>, using a significance level of 0.05.

## 552 **Random Forest Approach**

553 A Random Forest Algorithm (RFA) was used in order to predict a response variable (water sources) of each  
554 sample independently, using measurements on individual gene, gene class and microbiota level (predictor  
555 variables). To run the RFA the R-package randomForest was used: Breiman and Cutler's Random Forests  
556 for Classification and Regression, a software package for the R-statistical environment<sup>67</sup>. In summary, the  
557 RFA follows the pseudo-steps: (I) the response variable and predictor variables are chosen by the user; (II)  
558 a predefined number of independent bootstrap samples are drawn from the dataset with replacement,  
559 and a classification tree is fit to each sample containing roughly 2/3 of the data, for which predictor  
560 variable selection on each node split in the tree is conducted using only a small random subset of predictor  
561 variables; (III) the complete set of trees, one for each bootstrap sample, composes the random forest (RF),  
562 from which the status (classification) of the response variable is predicted as an average (majority vote)  
563 of the predictions of all trees. Compared to single classification trees, RFA increases prediction accuracy,  
564 since the ensemble of slight different classification results adjusts for the instability of the individual trees  
565 and avoids data overfitting<sup>68</sup>. The Mean Decrease Accuracy (MDA), or Breiman-Cutler importance, was  
566 employed as a measure of predictor variable importance, for which classification accuracy after data  
567 permutation of a predictor variable is subtracted from the accuracy without permutation, and averaged  
568 over all trees in the RF to give an importance value [2]. It should be noted that since all predictor variables  
569 were of numeric nature, using RFA is equivalent to regression over classification trees. For the results  
570 presented here and in supplementary text, only the 2.5% of top RFA scores were considered (as presented  
571 by the resulting MDA distribution of all predictor variables) , thus selecting the subset of predictor  
572 variables which appear statistically more informative than expected in the background of all predictor  
573 variables (i.e. we assume that 95% of the RFA scores fall between the 2.5th and 97.5th percentiles, as  
574 done elsewhere<sup>69</sup>).

575

576 **Data availability:** 16S rRNA sequence data are available at the European Nucleotide Archive (ENA) under  
577 the accession number PRJEB29948. All other important raw data needed to reconstruct the findings of  
578 our study are made available in the supplementary material.

579

580 **Funding:**

581 **E. Buelow** has received funding from the European Union's Horizon 2020 research and innovation  
582 program under the Marie Skłodowska-Curie grant agreement RESOLVE 707999-standard EF.

583 **A. Rico** is supported by a postdoctoral grant provided by the Spanish Ministry of Science, Innovation and  
584 University (IJCI-2017-33465).

585 **J. Lourenço** is supported by a Lectureship from the Department of Zoology, University of Oxford.

586 16S rRNA sequence Data collection and analyses performed by the **IBEST Genomics Resources Core at**  
587 **the University of Idaho** were supported in part by NIH COBRE grant P30GM103324.

588

589 **Acknowledgements:** The authors thank the SIPIBEL Consortium and the SIPIBEL field observatory on the  
590 hospital's effluents and urban wastewater treatment plants for displaying data and measurements.

591

592 **Author contributions:**

593 **C.D., M-C.P., and E.B.** designed the study, **C.D.** provided access to the SIPIBEL data collection, **M.G.** and  
594 **E.B.** performed experiments, **E.B., A.R., J.L.** and **S.P.K.** performed data analysis, **L.W.** performed chemical  
595 analysis (SIPIBEL project), **E.B., M-C.P.** and **C.D.** wrote the manuscript with contribution of all other co-  
596 authors.

597

598 **Competing interests:** The authors declare no competing interests.

599  
600  
601  
602  
603  
604  
605  
606  
607  
608  
609  
610  
611  
612  
613  
614  
615  
616  
617  
618  
619  
620  
621  
622

## References

1. Cassini, A. *et al.* Attributable deaths and disability-adjusted life-years caused by infections with antibiotic-resistant bacteria in the EU and the European Economic Area in 2015: a population-level modelling analysis. *Lancet Infectious Dis.* (2018).
2. Nadimpalli, M. *et al.* Combating Global Antibiotic Resistance: Emerging One Health Concerns in Lower- and Middle-Income Countries. *Clin. Infect. Dis. Off. Publ. Infect. Dis. Soc. Am.* **66**, 963–969 (2018).
3. Stemming the Superbug Tide | READ online. *OECD iLibrary* Available at: [https://read.oecd-ilibrary.org/social-issues-migration-health/stemming-the-superbug-tide\\_9789264307599-en](https://read.oecd-ilibrary.org/social-issues-migration-health/stemming-the-superbug-tide_9789264307599-en). (Accessed: 9th April 2019)
4. Larsson, D. G. J. *et al.* Critical knowledge gaps and research needs related to the environmental dimensions of antibiotic resistance. *Environ. Int.* **117**, 132–138 (2018).
5. Berendonk, T. U. *et al.* Tackling antibiotic resistance: the environmental framework. *Nat. Rev.* **13**, 310–317 (2015).
6. Canton, R. Antibiotic resistance genes from the environment: a perspective through newly identified antibiotic resistance mechanisms in the clinical setting. *Clin. Microbiol. Infect. Off. Publ. Eur. Soc. Clin. Microbiol. Infect. Dis.* **15 Suppl 1**, 20–25 (2009).
7. Allen, H. K. *et al.* Call of the wild: antibiotic resistance genes in natural environments. *Nat. Rev.* **8**, 251–259 (2010).
8. Flandroy, L. *et al.* The impact of human activities and lifestyles on the interlinked microbiota and health of humans and of ecosystems. *Sci. Total Environ.* **627**, 1018–1038 (2018).
9. Buelow, E. *et al.* Limited influence of hospital wastewater on the microbiome and resistome of wastewater in a community sewerage system. *FEMS Microbiol. Ecol.* (2018).  
doi:10.1093/femsec/fiy087

- 623 10. Jin, L. *et al.* Emergence of *mcr-1* and carbapenemase genes in hospital sewage water in Beijing,  
624 China. *J. Antimicrob. Chemother.* **73**, 84–87 (2018).
- 625 11. Manaia, C. M. *et al.* Antibiotic resistance in wastewater treatment plants: Tackling the black box.  
626 *Environ. Int.* **115**, 312–324 (2018).
- 627 12. Wang, Q., Wang, P. & Yang, Q. Occurrence and diversity of antibiotic resistance in untreated  
628 hospital wastewater. *Sci. Total Environ.* **621**, 990–999 (2018).
- 629 13. Chonova, T. *et al.* Separate treatment of hospital and urban wastewaters: A real scale comparison of  
630 effluents and their effect on microbial communities. *Sci. Total Environ.* **542**, 965–975 (2016).
- 631 14. Raheem, A. *et al.* Opportunities and challenges in sustainable treatment and resource reuse of  
632 sewage sludge: A review. *Chem. Eng. J.* **337**, 616–641 (2018).
- 633 15. Pallares-Vega, R. *et al.* Determinants of presence and removal of antibiotic resistance genes during  
634 WWTP treatment: A cross-sectional study. *Water Res.* (2019). doi:10.1016/j.watres.2019.05.100
- 635 16. Zhu, Y. G. *et al.* Continental-scale pollution of estuaries with antibiotic resistance genes. *Nat.*  
636 *Microbiol.* **2**, 16270 (2017).
- 637 17. Rodriguez-Mozaz, S. *et al.* Occurrence of antibiotics and antibiotic resistance genes in hospital and  
638 urban wastewaters and their impact on the receiving river. *Water Res.* **Volume 69**, 234–242 (2015).
- 639 18. Robert, J. *et al.* Point prevalence survey of antibiotic use in French hospitals in 2009. *J. Antimicrob.*  
640 *Chemother.* **67**, 1020–1026 (2012).
- 641 19. Bush, K. *et al.* Tackling antibiotic resistance. *Nat. Rev.* **9**, 894–896 (2011).
- 642 20. Lienert, J., Koller, M., Konrad, J., McArdell, C. S. & Schuwirth, N. Multiple-criteria decision analysis  
643 reveals high stakeholder preference to remove pharmaceuticals from hospital wastewater. *Environ.*  
644 *Sci. Technol.* **45**, 3848–3857 (2011).
- 645 21. Stalder, T. *et al.* Quantitative and qualitative impact of hospital effluent on dissemination of the  
646 integron pool. *ISME J.* **8**, 768–777 (2014).

- 647 22. Forslund, K. *et al.* Country-specific antibiotic use practices impact the human gut resistome. *Genome*  
648 *Res.* **23**, 1163–1169 (2013).
- 649 23. Hu, Y. *et al.* Metagenome-wide analysis of antibiotic resistance genes in a large cohort of human gut  
650 microbiota. *Nat. Commun.* **4**, 2151 (2013).
- 651 24. Pal, C., Bengtsson-Palme, J., Kristiansson, E. & Larsson, D. G. Co-occurrence of resistance genes to  
652 antibiotics, biocides and metals reveals novel insights into their co-selection potential. *BMC*  
653 *Genomics* **16**, 964-015-2153-5 (2015).
- 654 25. Gnanadhas, D. P., Marathe, S. A. & Chakravorty, D. Biocides--resistance, cross-resistance  
655 mechanisms and assessment. *Expert Opin. Investig. Drugs* **22**, 191–206 (2013).
- 656 26. Zhu, Y. G. *et al.* Diverse and abundant antibiotic resistance genes in Chinese swine farms. *Proc. Natl.*  
657 *Acad. Sci. U. S. A.* **110**, 3435–3440 (2013).
- 658 27. Gillings, M. R. *et al.* Using the class 1 integron-integrase gene as a proxy for anthropogenic pollution.  
659 *ISME J.* **9**, 1269–1279 (2015).
- 660 28. Chonova, T. *et al.* The SIPIBEL project: treatment of hospital and urban wastewater in a  
661 conventional urban wastewater treatment plant. *Environ. Sci. Pollut. Res. Int.* **25**, 9197–9206 (2018).
- 662 29. Buelow, E. *et al.* Comparative gut microbiota and resistome profiling of intensive care patients  
663 receiving selective digestive tract decontamination and healthy subjects. *Microbiome* **5**, 88-017-  
664 0309-z (2017).
- 665 30. Sommer, M. O., Church, G. M. & Dantas, G. The human microbiome harbors a diverse reservoir of  
666 antibiotic resistance genes. *Virulence* **1**, 299–303 (2010).
- 667 31. Ruppe, E. *et al.* Prediction of the intestinal resistome by a three-dimensional structure-based  
668 method. *Nat. Microbiol.* (2018). doi:10.1038/s41564-018-0292-6
- 669 32. Rajilic-Stojanovic, M. & de Vos, W. M. The first 1000 cultured species of the human gastrointestinal  
670 microbiota. *FEMS Microbiol. Rev.* **38**, 996–1047 (2014).

- 671 33. Costea, P. I. *et al.* Enterotypes in the landscape of gut microbial community composition. *Nat.*  
672 *Microbiol.* **3**, 8–16 (2018).
- 673 34. Rozwandowicz, M. *et al.* Plasmids carrying antimicrobial resistance genes in Enterobacteriaceae. *J.*  
674 *Antimicrob. Chemother.* **73**, 1121–1137 (2018).
- 675 35. Carattoli, A. Resistance Plasmid Families in Enterobacteriaceae. *Antimicrob. Agents Chemother.* **53**,  
676 2227–2238 (2009).
- 677 36. Karkman, A., Parnanen, K. & Larsson, D. G. J. Fecal pollution can explain antibiotic resistance gene  
678 abundances in anthropogenically impacted environments. *Nat. Commun.* **10**, 80-018-07992–3  
679 (2019).
- 680 37. Su, J. Q. *et al.* Metagenomics of urban sewage identifies an extensively shared antibiotic resistome  
681 in China. *Microbiome* **5**, 84-017-0298-y (2017).
- 682 38. Wiest, L. *et al.* Two-year survey of specific hospital wastewater treatment and its impact on  
683 pharmaceutical discharges. *Environ. Sci. Pollut. Res. Int.* **25**, 9207–9218 (2018).
- 684 39. Chonova, T. *et al.* River biofilm community changes related to pharmaceutical loads emitted by a  
685 wastewater treatment plant. *Environ. Sci. Pollut. Res. Int.* **25**, 9254–9264 (2018).
- 686 40. Laquaz, M. *et al.* Ecotoxicity and antibiotic resistance of a mixture of hospital and urban sewage in a  
687 wastewater treatment plant. *Environ. Sci. Pollut. Res. Int.* **25**, 9243–9253 (2018).
- 688 41. Karkman, A. *et al.* High-throughput quantification of antibiotic resistance genes from an urban  
689 wastewater treatment plant. *FEMS Microbiol. Ecol.* **92**, 10.1093/femsec/fiw014. Epub 2016 Jan 31  
690 (2016).
- 691 42. Di Cesare, A. *et al.* Co-occurrence of integrase 1, antibiotic and heavy metal resistance genes in  
692 municipal wastewater treatment plants. *Water Res.* **94**, 208–214 (2016).

- 693 43. Lee, J. *et al.* Quantitative and qualitative changes in antibiotic resistance genes after passing through  
694 treatment processes in municipal wastewater treatment plants. *Sci. Total Environ.* **605–606**, 906–  
695 914 (2017).
- 696 44. Jäger, T. *et al.* Reduction of Antibiotic Resistant Bacteria During Conventional and Advanced  
697 Wastewater Treatment, and the Disseminated Loads Released to the Environment. *Front. Microbiol.*  
698 **9**, (2018).
- 699 45. Wild, C. P. Complementing the Genome with an “Exposome”: The Outstanding Challenge of  
700 Environmental Exposure Measurement in Molecular Epidemiology. *Cancer Epidemiol. Prev.*  
701 *Biomark.* **14**, 1847–1850 (2005).
- 702 46. Escher, B. I. *et al.* From the exposome to mechanistic understanding of chemical-induced adverse  
703 effects. *Environ. Int.* **99**, 97–106 (2017).
- 704 47. Palmer, M. & Hatley, H. The role of surfactants in wastewater treatment: Impact, removal and  
705 future techniques: A critical review. *Water Res.* **147**, 60–72 (2018).
- 706 48. Pereira, B. M. P. & Tagkopoulos, I. Benzalkonium chlorides: Uses, regulatory status, and microbial  
707 resistance. *Appl. Environ. Microbiol.* AEM.00377-19 (2019). doi:10.1128/AEM.00377-19
- 708 49. Cairns, J., Becks, L., Jalasvuori, M. & Hiltunen, T. Sublethal streptomycin concentrations and lytic  
709 bacteriophage together promote resistance evolution. *Philos. Trans. R. Soc. Lond. B. Biol. Sci.* **372**,  
710 (2017).
- 711 50. Hendry, A. P., Gotanda, K. M. & Svensson, E. I. Human influences on evolution, and the ecological  
712 and societal consequences. *Philos. Trans. R. Soc. B Biol. Sci.* **372**, (2017).
- 713 51. Varela, A. R., Andre, S., Nunes, O. C. & Manaia, C. M. Insights into the relationship between  
714 antimicrobial residues and bacterial populations in a hospital-urban wastewater treatment plant  
715 system. *Water Res.* **54**, 327–336 (2014).



- 716 52. Szekeres, E. *et al.* Abundance of antibiotics, antibiotic resistance genes and bacterial community  
717 composition in wastewater effluents from different Romanian hospitals. *Environ. Pollut. Barking*  
718 *Essex 1987* **225**, 304–315 (2017).
- 719 53. Bengtsson-Palme, J. & Larsson, D. G. Concentrations of antibiotics predicted to select for resistant  
720 bacteria: Proposed limits for environmental regulation. *Environ. Int.* **86**, 140–149 (2016).
- 721 54. Bengtsson-Palme, J., Kristiansson, E. & Larsson, D. G. J. Environmental factors influencing the  
722 development and spread of antibiotic resistance. *FEMS Microbiol. Rev.* **42**, 10.1093/femsre/fux053  
723 (2018).
- 724 55. Rowe, W. P. M. *et al.* Overexpression of antibiotic resistance genes in hospital effluents over time. *J.*  
725 *Antimicrob. Chemother.* **72**, 1617–1623 (2017).
- 726 56. Shafran, A. W., Gross, A., Ronen, Z., Weisbrod, N. & Adar, E. Effects of surfactants originating from  
727 reuse of greywater on capillary rise in the soil. *Water Sci. Technol. J. Int. Assoc. Water Pollut. Res.*  
728 **52**, 157–166 (2005).
- 729 57. Siggins, A., Burton, V., Ross, C., Lowe, H. & Horswell, J. Effects of long-term greywater disposal on  
730 soil: A case study. *Sci. Total Environ.* **557–558**, 627–635 (2016).
- 731 58. Jardak, K., Drogui, P. & Daghrir, R. Surfactants in aquatic and terrestrial environment: occurrence,  
732 behavior, and treatment processes. *Environ. Sci. Pollut. Res. Int.* **23**, 3195–3216 (2016).
- 733 59. Backhaus, T., Snape, J. & Lazorchak, J. The impact of chemical pollution on biodiversity and  
734 ecosystem services: the need for an improved understanding. *Integr. Environ. Assess. Manag.* **8**,  
735 575–576 (2012).
- 736 60. Burgmann, H. *et al.* Water and sanitation: an essential battlefield in the war on antimicrobial  
737 resistance. *FEMS Microbiol. Ecol.* **94**, 10.1093/femsec/fiy101 (2018).
- 738 61. Pehrsson, E. C. *et al.* Interconnected microbiomes and resistomes in low-income human habitats.  
739 *Nature* **533**, 212–216 (2016).

- 740 62. Gouliouris, T. *et al.* Detection of vancomycin-resistant *Enterococcus faecium* hospital-adapted  
741 lineages in municipal wastewater treatment plants indicates widespread distribution and release  
742 into the environment. *Genome Res.* (2019). doi:10.1101/gr.232629.117
- 743 63. Barraud, O., Baclet, M. C., Denis, F. & Ploy, M. C. Quantitative multiplex real-time PCR for detecting  
744 class 1, 2 and 3 integrons. *J. Antimicrob. Chemother.* **65**, 1642–1645 (2010).
- 745 64. Magoc, T. & Salzberg, S. L. FLASH: fast length adjustment of short reads to improve genome  
746 assemblies. *Bioinforma. Oxf. Engl.* **27**, 2957–2963 (2011).
- 747 65. Wang, Q., Garrity, G. M., Tiedje, J. M. & Cole, J. R. Naive Bayesian classifier for rapid assignment of  
748 rRNA sequences into the new bacterial taxonomy. *Appl. Environ. Microbiol.* **73**, 5261–5267 (2007).
- 749 66. Braak, C. J. F. ter & Smilauer, P. *Canoco reference manual and user's guide: software for ordination,*  
750 *version 5.0.* (Microcomputer Power, 2012).
- 751 67. Breiman, L. Random Forests. *Mach. Learn.* **45**, 5–32 (2001).
- 752 68. Hastie, T., Tibshirani, R. & Friedman, J. *The Elements of Statistical Learning: Data Mining, Inference,*  
753 *and Prediction, Second Edition.* (Springer-Verlag, 2009).
- 754 69. Lourenco, J. *et al.* Lineage structure of *Streptococcus pneumoniae* may be driven by immune  
755 selection on the groEL heat-shock protein. *Sci. Rep.* **7**, 9023-017-08990-z (2017).
- 756
